# Supplementary material for: Foveal processing of emotion-informative facial features
Source: PubMed Central journal article supplement (PMC8638924; doi:10.1371/journal.pone.0260814), 2021-12-02
Supplement: pone.0260814.s007.pdf [file pone.0260814.s007.pdf]

**S1 Table. Results of pairwise comparisons for the saccade path analyses for Experiment**

**1: main effect of target location.**

| Target location contrast                        | <i>t</i> | <i>p</i> | <i>d<sub>z</sub></i> effect size [95% CI] |
|-------------------------------------------------|----------|----------|-------------------------------------------|
| <u>From initial fixation on the left eye</u>    |          |          |                                           |
| Brow > left cheek                               | 7.57     | < .001   | 1.456 [0.904 1.994]                       |
| Brow > mouth                                    | 6.69     | < .001   | 1.288 [0.768 1.795]                       |
| Brow > right cheek                              | 6.24     | < .001   | 1.201 [0.696 1.692]                       |
| Brow > right eye                                | 5.27     | < .001   | 1.014 [0.541 1.473]                       |
| Right eye > left cheek                          | 8.7      | < .001   | 1.675 [1.079 2.257]                       |
| Right eye > mouth                               | 7.97     | < .001   | 1.534 [0.966 2.087]                       |
| Right eye > right cheek                         | 7.73     | < .001   | 1.487 [0.929 2.031]                       |
| Right cheek > left cheek                        | 9.08     | < .001   | 1.747 [1.136 2.345]                       |
| Right cheek > mouth                             | 8.24     | < .001   | 1.585 [1.007 2.149]                       |
| Mouth > left cheek                              | 9.46     | < .001   | 1.821 [1.194 2.435]                       |
| <u>From initial fixation on the right eye</u>   |          |          |                                           |
| Brow > left cheek                               | 10.0     | < .001   | 1.924 [1.275 2.56]                        |
| Brow > mouth                                    | 10.27    | < .001   | 1.976 [1.315 2.623]                       |
| Brow > right cheek                              | 10.92    | < .001   | 2.102 [1.413 2.777]                       |
| Brow > left eye                                 | 9.12     | < .001   | 1.756 [1.143 2.355]                       |
| Left eye > left cheek                           | 9.71     | < .001   | 1.868 [1.231 2.355]                       |
| Left eye > mouth                                | 9.91     | < .001   | 1.907 [1.262 2.54]                        |
| Left eye > right cheek                          | 10.76    | < .001   | 2.07 [1.389 2.739]                        |
| Left cheek > mouth                              | 9.47     | < .001   | 1.823 [1.196 2.437]                       |
| Left cheek > right cheek                        | 10.57    | < .001   | 2.035 [1.361 2.695]                       |
| Mouth > right cheek                             | 10.43    | < .001   | 2.007 [1.34 2.662]                        |
| <u>From initial fixation on the right cheek</u> |          |          |                                           |
| Mouth > left cheek                              | 3.67     | .001     | 0.706 [0.278 1.123]                       |
| Mouth > left eye                                | 3.56     | .001     | 0.684 [0.259 1.099]                       |
| Mouth > brow                                    | 3.47     | .002     | 0.667 [0.243 1.08]                        |
| Left cheek > left eye                           | 3.26     | .003     | 0.627 [0.208 1.035]                       |

---

|                        |      |      |                     |
|------------------------|------|------|---------------------|
| Left cheek > brow      | 3.12 | .004 | 0.601 [0.185 1.007] |
| Mouth > right eye      | 3.12 | .004 | 0.599 [0.184 1.005] |
| Left eye > brow        | 2.8  | .009 | 0.539 [0.13 0.939]  |
| Left cheek > right eye | 2.58 | .016 | 0.497 [0.092 0.893] |

---

All  $df = 26$ , all p-values uncorrected. Only significant contrasts are shown. For each set of pairwise comparisons, minimum Bonferroni-Holm adjusted  $\alpha = .005$ .
