# Supplementary material for: Foveal processing of emotion-informative facial features
Source: PubMed Central journal article supplement (PMC8638924; doi:10.1371/journal.pone.0260814), 2021-12-02
Supplement: pone.0260814.s008.pdf [file pone.0260814.s008.pdf]

**S2 Table. Results of pairwise comparisons for the saccade path analyses for Experiment**

**1: simple main effects for saccades from initial fixation on the right cheek.**

| Target location contrast | <i>t</i> | <i>p</i> | <i>d<sub>z</sub></i> effect size [95% CI] |
|--------------------------|----------|----------|-------------------------------------------|
| <u>Angry faces</u>       |          |          |                                           |
| Mouth > left cheek       | 3.19     | .004     | 0.613 [0.196 1.02]                        |
| Mouth > left eye         | 3.06     | .005     | 0.598 [0.175 0.994]                       |
| <u>Fearful faces</u>     |          |          |                                           |
| Mouth > left eye         | 4.12     | < .001   | 0.793 [0.353 1.221]                       |
| Mouth > left cheek       | 4.12     | < .001   | 0.793 [0.353 1.221]                       |
| Mouth > brow             | 4.01     | < .001   | 0.772 [0.335 1.197]                       |
| Mouth > right eye        | 3.71     | < .001   | 0.714 [0.285 1.132]                       |
| Left cheek > left eye    | 3.92     | < .001   | 0.755 [0.32 1.178]                        |
| Left cheek > brow        | 3.69     | .001     | 0.71 [0.281 1.128]                        |
| Left cheek > right eye   | 3.21     | .003     | 0.618 [0.201 1.026]                       |
| Left eye > brow          | 3.24     | .003     | 0.623 [0.205 1.031]                       |
| Left eye > right eye     | 2.68     | .012     | 0.517 [0.11 0.914]                        |
| Brow > right eye         | 2.33     | .028     | 0.449 [0.049 0.842]                       |
| <u>Surprised faces</u>   |          |          |                                           |
| Mouth > left cheek       | 3.55     | .001     | 0.683 [0.258 1.098]                       |
| Mouth > left eye         | 3.51     | .002     | 0.676 [0.252 1.09]                        |
| Mouth > brow             | 3.37     | .002     | 0.649 [0.228 1.06]                        |
| Mouth > right eye        | 2.93     | .007     | 0.564 [0.153 0.967]                       |
| Left cheek > left eye    | 3.25     | .003     | 0.625 [0.207 1.033]                       |
| Left cheek > brow        | 2.95     | .007     | 0.568 [0.156 0.97]                        |

All *df* = 26. Only significant contrasts are shown. For each set of pairwise comparisons, minimum Bonferroni-Holm adjusted  $\alpha = .005$ .
