# Supplementary material for: Foveal processing of emotion-informative facial features
Source: PubMed Central journal article supplement (PMC8638924; doi:10.1371/journal.pone.0260814), 2021-12-02
Supplement: pone.0260814.s009.pdf [file pone.0260814.s009.pdf]

**S3 Table. Results of pairwise comparisons for the saccade path analyses for Experiment****2a: main effect of target location.**

| Target location contrast                       | <i>t</i> | <i>p</i> | <i>d<sub>z</sub></i> effect size [95% CI] |
|------------------------------------------------|----------|----------|-------------------------------------------|
| <u>From initial fixation on the left eye</u>   |          |          |                                           |
| Right eye > left cheek                         | 7.75     | < .001   | 1.257 [0.825 1.679]                       |
| Right eye > mouth                              | 5.27     | < .001   | 0.855 [0.479 1.224]                       |
| Right eye > right cheek                        | 4.2      | < .001   | 0.682 [0.324 1.032]                       |
| Brow > left cheek                              | 4.96     | < .001   | 0.804 [0.433 1.166]                       |
| Brow > mouth                                   | 3.08     | .004     | 0.5 [0.16 0.835]                          |
| Right cheek > left cheek                       | 10.1     | < .001   | 1.639 [1.145 2.124]                       |
| Right cheek > mouth                            | 6.82     | < .001   | 1.107 [0.697 1.508]                       |
| Mouth > left cheek                             | 11.96    | < .001   | 1.941 [1.393 2.479]                       |
| <u>From initial fixation on the right eye</u>  |          |          |                                           |
| Brow > left eye                                | 5.08     | < .001   | 0.823 [0.45 1.188]                        |
| Brow > mouth                                   | 5.0      | < .001   | 0.81 [0.439 1.173]                        |
| Brow > left cheek                              | 4.96     | < .001   | 0.804 [0.433 1.167]                       |
| Brow > right cheek                             | 5.28     | < .001   | 0.856 [0.48 1.225]                        |
| Left eye > left cheek                          | 4.63     | < .001   | 0.751 [0.387 1.108]                       |
| Left eye > mouth                               | 4.74     | < .001   | 0.768 [0.402 1.127]                       |
| Left eye > right cheek                         | 5.17     | < .001   | 0.838 [0.463 1.205]                       |
| Left cheek > mouth                             | 4.8      | < .001   | 0.779 [0.411 1.139]                       |
| Left cheek > right cheek                       | 5.36     | < .001   | 0.87 [0.491 1.24]                         |
| Mouth > right cheek                            | 5.55     | < .001   | 0.9 [0.518 1.274]                         |
| <u>From initial fixation on the left cheek</u> |          |          |                                           |
| Brow > left eye                                | 3.9      | < .001   | 0.633 [0.28 0.978]                        |
| Right eye > left eye                           | 3.9      | < .001   | 0.632 [0.28 0.977]                        |
| Right eye > brow                               | 3.86     | < .001   | 0.626 [0.274 0.971]                       |
| Right cheek > left eye                         | 3.79     | < .001   | 0.615 [0.264 0.959]                       |
| Right cheek > brow                             | 3.69     | < .001   | 0.598 [0.249 0.94]                        |
| Right cheek > right eye                        | 3.56     | .001     | 0.577 [0.23 0.918]                        |

|                                                 |      |        |                     |
|-------------------------------------------------|------|--------|---------------------|
| Mouth > left eye                                | 3.19 | .003   | 0.517 [0.175 0.853] |
| Mouth > brow                                    | 2.93 | .006   | 0.476 [0.137 0.809] |
| Mouth > right cheek                             | 2.15 | .038   | 0.349 [0.02 0.675]  |
| <u>From initial fixation on the right cheek</u> |      |        |                     |
| Mouth > left eye                                | 4.44 | < .001 | 0.72 [0.359 1.074]  |
| Mouth > right eye                               | 3.1  | .004   | 0.503 [0.162 0.838] |
| Mouth > brow                                    | 3.92 | < .001 | 0.636 [0.283 0.981] |
| Mouth > left cheek                              | 5.41 | < .001 | 0.878 [0.498 1.248] |
| Left cheek > left eye                           | 2.85 | .007   | 0.462 [0.124 0.794] |

All  $df = 37$ , all p-values uncorrected. Only significant contrasts are shown. For each set of pairwise comparisons, minimum Bonferroni-Holm adjusted  $\alpha = .005$ .
