# Supplementary material for: Foveal processing of emotion-informative facial features
Source: PubMed Central journal article supplement (PMC8638924; doi:10.1371/journal.pone.0260814), 2021-12-02
Supplement: pone.0260814.s010.pdf [file pone.0260814.s010.pdf]

**S4 Table. Results of pairwise comparisons for the fixation duration analyses of Experiment 2b: main effects of emotion.**

| Emotion contrast   | <i>t</i> | <i>p</i> | <i>d<sub>z</sub></i> effect size [95% CI] |
|--------------------|----------|----------|-------------------------------------------|
| <u>Eyes</u>        |          |          |                                           |
| Fear > anger       | 8.44     | < .001   | 1.35 [0.91 1.78]                          |
| Fear > disgust     | 8.17     | < .001   | 1.31 [0.88 1.73]                          |
| Fear > surprise    | -1.2     | .24      | -0.19 [-0.51 0.13]                        |
| Surprise > anger   | 9.55     | < .001   | 1.53 [1.06 1.99]                          |
| Surprise > disgust | 8.02     | < .001   | 1.28 [0.85 1.71]                          |
| Anger > disgust    | 0.62     | .54      | 0.1 [-0.22 0.41]                          |
| <u>Brow</u>        |          |          |                                           |
| Fear > anger       | -6.24    | < .001   | -1.0 [-1.38 -0.61]                        |
| Fear > disgust     | -8.58    | < .001   | -1.37 [-1.81 -0.93]                       |
| Fear > surprise    | 3.16     | .003     | 0.51 [0.17 0.84]                          |
| Surprise > anger   | -6.49    | < .001   | -1.04 [-1.43 -0.64]                       |
| Surprise > disgust | -8.31    | < .001   | -1.33 [-1.76 -0.89]                       |
| Anger > disgust    | 0.06     | .95      | 0.01 [-0.3 0.32]                          |
| <u>Nose</u>        |          |          |                                           |
| Fear > anger       | -0.12    | .91      | -0.2 [-0.33 0.3]                          |
| Fear > disgust     | -4.22    | < .001   | -0.68 [-1.02 -0.32]                       |
| Fear > surprise    | 0.53     | .6       | 0.081 [-0.23 0.4]                         |
| Surprise > anger   | -0.46    | .65      | -0.07 [-0.39 0.24]                        |
| Surprise > disgust | -4.36    | < .001   | -0.7 [-1.04 -0.34]                        |
| Anger > disgust    | -4.55    | < .001   | -0.73 [-1.08 -0.37]                       |
| <u>Mouth</u>       |          |          |                                           |
| Fear > anger       | 6.13     | < .001   | 0.98 [0.59 1.36]                          |
| Fear > disgust     | -5.86    | < .001   | -0.94 [-1.31 -0.56]                       |
| Fear > surprise    | -1.9     | .07      | -0.3 [-0.62 0.02]                         |
| Surprise > anger   | 6.59     | < .001   | 1.06 [0.66 1.44]                          |
| Surprise > disgust | -4.59    | < .001   | -0.74 [-1.09 -0.38]                       |

---

|                 |       |        |                     |
|-----------------|-------|--------|---------------------|
| Anger > disgust | -8.65 | < .001 | -1.39 [-1.82 -0.94] |
|-----------------|-------|--------|---------------------|

---

All  $df = 38$ , all p-values uncorrected. For each set of pairwise comparisons, minimum Bonferroni-Holm adjusted  $\alpha = .0083$ .
