# Supplementary material for: Foveal processing of emotion-informative facial features
Source: PubMed Central journal article supplement (PMC8638924; doi:10.1371/journal.pone.0260814), 2021-12-02
Supplement: pone.0260814.s011.pdf [file pone.0260814.s011.pdf]

**S5 Table. Results of pairwise comparisons for the fixation duration analyses of Experiment 2b: main effects of region of interest.**

| Fixation location contrast | <i>t</i> | <i>p</i> | <i>d<sub>z</sub></i> effect size [95% CI] |
|----------------------------|----------|----------|-------------------------------------------|
| <u>Angry faces</u>         |          |          |                                           |
| Eyes > brow                | 8.82     | < .001   | 1.41 [0.96 1.85]                          |
| Eyes > nose                | 0.82     | .42      | 0.13 [-0.19 0.45]                         |
| Eyes > mouth               | 7.51     | < .001   | 1.2 [0.79 1.61]                           |
| Nose > brow                | 8.44     | < .001   | 1.35 [0.91 1.78]                          |
| Nose > mouth               | 6.89     | < .001   | 1.1 [0.7 1.5]                             |
| Mouth > brow               | 1.32     | .2       | 0.21 [-0.11 0.53]                         |
| <u>Disgusted faces</u>     |          |          |                                           |
| Eyes > brow                | 8.87     | < .001   | 1.42 [0.97 1.86]                          |
| Eyes > nose                | -0.05    | .96      | -0.01 [-0.32 0.31]                        |
| Eyes > mouth               | 3.8      | < .001   | 0.61 [0.26 0.95]                          |
| Nose > brow                | 10.91    | < .001   | 1.75 [1.24 2.25]                          |
| Nose > mouth               | 4.5      | < .001   | 0.72 [0.36 1.07]                          |
| Mouth > brow               | 5.05     | < .001   | 0.81 [0.44 1.17]                          |
| <u>Fearful faces</u>       |          |          |                                           |
| Eyes > brow                | 12.0     | < .001   | 1.92 [1.38 2.45]                          |
| Eyes > nose                | 2.3      | .027     | 0.37 [0.04 0.69]                          |
| Eyes > mouth               | 6.96     | < .001   | 1.11 [0.71 1.51]                          |
| Nose > brow                | 9.76     | < .001   | 1.56 [1.09 2.03]                          |
| Nose > mouth               | 4.26     | < .001   | 0.68 [0.33 1.03]                          |
| Mouth > brow               | 5.01     | < .001   | 0.8 [0.44 1.16]                           |
| <u>Surprised faces</u>     |          |          |                                           |
| Eyes > brow                | 13.07    | < .001   | 2.09 [1.52 2.65]                          |
| Eyes > nose                | 2.7      | .01      | 0.43 [0.1 0.76]                           |
| Eyes > mouth               | 6.99     | < .001   | 1.12 [0.71 1.52]                          |
| Nose > brow                | 10.34    | < .001   | 1.66 [1.17 2.14]                          |
| Nose > mouth               | 4.14     | < .001   | 0.66 [0.31 1.01]                          |

---

|              |      |        |                  |
|--------------|------|--------|------------------|
| Mouth > brow | 6.01 | < .001 | 0.96 [0.58 1.34] |
|--------------|------|--------|------------------|

---

All  $df = 38$ , all p-values uncorrected. For each set of pairwise comparisons, minimum Bonferroni-Holm adjusted  $\alpha = .0083$ .
