# Supplementary material for: Foveal processing of emotion-informative facial features
Source: PubMed Central journal article supplement (PMC8638924; doi:10.1371/journal.pone.0260814), 2021-12-02
Supplement: pone.0260814.s012.pdf [file pone.0260814.s012.pdf]

**S6 Table. Results of pairwise comparisons for the percentage fixation duration analyses of Experiment 2b: main effects of emotion.**

| Emotion contrast   | <i>statistic</i> | <i>p</i> | effect size [95% CI]           |
|--------------------|------------------|----------|--------------------------------|
| <u>Eyes</u>        |                  |          |                                |
| Fear > anger       | $t = 9.05$       | < .001   | $d_z = 1.45$ [0.99 1.9]        |
| Fear > disgust     | $t = 8.43$       | < .001   | $d_z = 1.35$ [0.91 1.78]       |
| Fear > surprise    | $t = -1.76$      | .09      | $d_z = -0.28$ [-0.6 0.04]      |
| Surprise > anger   | $t = 9.49$       | < .001   | $d_z = 1.52$ [1.05 1.98]       |
| Surprise > disgust | $t = 8.65$       | < .001   | $d_z = 1.39$ [0.94 1.82]       |
| Anger > disgust    | $t = 1.12$       | .27      | $d_z = 0.18$ [-0.14 0.5]       |
| <u>Brow</u>        |                  |          |                                |
| Fear > anger       | $W = 8$          | < .001   | $r_{rb} = -0.98$ [-0.99 -0.96] |
| Fear > disgust     | $W = 3$          | < .001   | $r_{rb} = -0.99$ [-1.0 -0.98]  |
| Fear > surprise    | $W = 611$        | .002     | $r_{rb} = 0.57$ [0.28 0.76]    |
| Surprise > anger   | $W = 13$         | < .001   | $r_{rb} = -0.97$ [-0.98 -0.93] |
| Surprise > disgust | $W = 0$          | < .001   | $r_{rb} = -1.0$                |
| Anger > disgust    | $W = 364$        | .73      | $r_{rb} = -0.07$ [-0.4 0.29]   |
| <u>Nose</u>        |                  |          |                                |
| Fear > anger       | $t = -0.35$      | .73      | $d_z = -0.06$ [-0.37 0.26]     |
| Fear > disgust     | $W = 170$        | .002     | $r_{rb} = -0.56$ [-0.76 -0.27] |
| Fear > surprise    | $W = 414$        | .75      | $r_{rb} = 0.06$ [-0.29 0.4]    |
| Surprise > anger   | $t = -0.29$      | .77      | $d_z = -0.05$ [-0.36 0.27]     |
| Surprise > disgust | $t = -3.8$       | < .001   | $d_z = -0.61$ [-0.95 -0.26]    |
| Anger > disgust    | $t = -4.5$       | < .001   | $d_z = -0.72$ [-1.07 -0.36]    |
| <u>Mouth</u>       |                  |          |                                |
| Fear > anger       | $W = 753$        | < .001   | $r_{rb} = 0.93$ [0.86 0.97]    |
| Fear > disgust     | $t = -5.37$      | < .001   | $d_z = -0.86$ [-1.22 -0.49]    |
| Fear > surprise    | $t = -1.86$      | .07      | $d_z = -0.3$ [-0.62 0.03]      |
| Surprise > anger   | $W = 771$        | < .001   | $r_{rb} = 0.98$ [0.95 0.99]    |
| Surprise > disgust | $t = -4.09$      | < .001   | $d_z = -0.66$ [-1.0 -0.31]     |
| Anger > disgust    | $W = 0$          | < .001   | $r_{rb} = -1.0$                |

All  $df = 38$ , all  $p$ -values uncorrected. For each set of pairwise comparisons, minimum Bonferroni-Holm adjusted  $\alpha = .0083$ .
