# Supplementary material for: Foveal processing of emotion-informative facial features
Source: PubMed Central journal article supplement (PMC8638924; doi:10.1371/journal.pone.0260814), 2021-12-02
Supplement: pone.0260814.s013.pdf [file pone.0260814.s013.pdf]

**S7 Table. Results of pairwise comparisons for the percentage fixation duration analyses of Experiment 2b: main effects of region of interest.**

| Fixation location contrast | <i>statistic</i> | <i>p</i> | effect size [95% CI]           |
|----------------------------|------------------|----------|--------------------------------|
| <u>Angry faces</u>         |                  |          |                                |
| Eyes > brow                | $W = 780$        | < .001   | $r_{rb} = 1.0$                 |
| Eyes > nose                | $t = 0.86$       | .39      | $d_z = 0.14 [-0.18 0.45]$      |
| Eyes > mouth               | $t = 7.92$       | < .001   | $d_z = 1.27 [0.84 1.69]$       |
| Nose > brow                | $W = 778$        | < .001   | $r_{rb} = 0.995 [0.989 0.998]$ |
| Nose > mouth               | $t = 7.17$       | < .001   | $d_z = 1.15 [0.74 1.55]$       |
| Mouth > brow               | $W = 458$        | .35      | $r_{rb} = 0.17 [-0.18 0.49]$   |
| <u>Disgusted faces</u>     |                  |          |                                |
| Eyes > brow                | $t = 9.34$       | < .001   | $d_z = 1.5 [1.03 1.95]$        |
| Eyes > nose                | $t = -0.06$      | .96      | $d_z = -0.01 [-0.32 0.31]$     |
| Eyes > mouth               | $t = 3.96$       | < .001   | $d_z = 0.63 [0.29 0.98]$       |
| Nose > brow                | $t = 11.42$      | < .001   | $d_z = 1.83 [1.31 2.34]$       |
| Nose > mouth               | $t = 4.62$       | < .001   | $d_z = 0.74 [0.38 1.09]$       |
| Mouth > brow               | $t = 5.23$       | < .001   | $d_z = 0.84 [0.47 1.2]$        |
| <u>Fearful faces</u>       |                  |          |                                |
| Eyes > brow                | $t = 12.58$      | < .001   | $d_z = 2.01 [1.46 2.56]$       |
| Eyes > nose                | $t = 2.35$       | .024     | $d_z = 0.38 [0.05 0.7]$        |
| Eyes > mouth               | $t = 7.3$        | < .001   | $d_z = 1.17 [0.76 1.57]$       |
| Nose > brow                | $W = 780$        | < .001   | $r_{rb} = 1.0$                 |
| Nose > mouth               | $t = 4.43$       | < .001   | $d_z = 0.71 [0.35 1.06]$       |
| Mouth > brow               | $W = 743$        | < .001   | $r_{rb} = 0.91 [0.81 0.95]$    |
| <u>Surprised faces</u>     |                  |          |                                |
| Eyes > brow                | $t = 13.52$      | < .001   | $d_z = 2.16 [1.587 2.74]$      |
| Eyes > nose                | $t = 2.83$       | .007     | $d_z = 0.45 [0.12 0.78]$       |
| Eyes > mouth               | $t = 7.31$       | < .001   | $d_z = 1.17 [0.76 1.57]$       |
| Nose > brow                | $W = 780$        | < .001   | $r_{rb} = 1.0$                 |
| Nose > mouth               | $t = 4.28$       | < .001   | $d_z = 0.69 [0.33 1.03]$       |
| Mouth > brow               | $W = 775$        | < .001   | $r_{rb} = 0.99 [0.97 1.0]$     |

All  $df = 38$ , all  $p$ -values uncorrected. For each set of pairwise comparisons, minimum Bonferroni-Holm adjusted  $\alpha = .0083$ .
